# Supplementary material for: Efficient non-doped blue organic light-emitting diodes: donor–acceptor type host materials
Source: Royal Society of Chemistry journal article supplement (doi:10.1039/c7ra11732a), 2017-01-01

## Supporting Information

### **Efficient Non-Doped Blue Organic Light-Emitting Diodes: Donor–Acceptor Type Host materials**

**Jayaraman Jayabharathi\***, Palanisamy Sujatha, Venugopal Thanikachalam, Palanivel Jeeva, Pavadai Nethaji

*Department of Chemistry, Annamalai University, Annamalainagar 608 002, Tamilnadu, India*

\* Tel: +91 9443940735; E-mail address: [jtchalam2005@yahoo.co.in](mailto:jtchalam2005@yahoo.co.in)

**Scheme S1:** Synthetic route of NPI-PITPA, MeNPI-PITPA and OMeNPI-PITPA

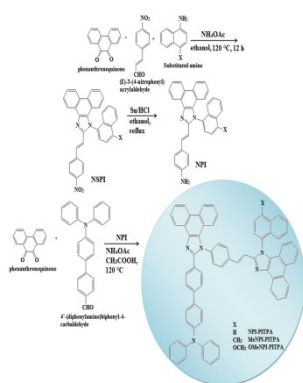

**Figure S1:** Emission spectra of NPI-PITPA, MeNPI-PITPA and OMeNPI-PITPA

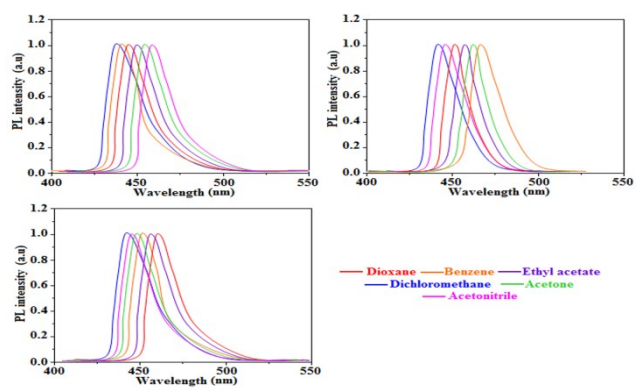

Supplement: c7ra11732a1.pdf [file c7ra11732a1.pdf]
